# Supplementary material
Source: ML conference proceedings conference paper supplement (https://openreview.net/forum?id=m9uHv1Pxq7)
Supplement: supplementary_material [file attachment]

---

# Supplementary Material for Learning Motion Refinement for Unsupervised Face Animation

---

Anonymous Author(s)

Affiliation

Address

email

1 In this supplementary, we present detailed information on the architectural design, evaluation metrics,  
2 cross-identity evaluation, component ablations, and a more comprehensive parameter analysis.  
3 Additionally, we include video results demonstrating same-identity reconstruction and cross-identity  
4 animation, which can be found in the provided files under the name "scorr\_animation.mp4". To  
5 facilitate understanding and further research, we are also sharing the code files, with our core module  
6 implementation available in "modules/scorr.py".

7 **Architecture details:** Our system mainly consists of a keypoint detector, a dense motion module,  
8 the source and driving structure encoders, a flow updater, and an image generator. The keypoint  
9 detector and dense motion modules are implemented using blocks similar to those used in previous  
10 works [5, 8]. In contrast, we provide architecture details of our source and driving structure encoders  
11 and image generator in Figure A1. All the modules are included in our provided codes for easy  
12 reference and implementation.

13 **Evaluation metrics:** We mainly introduce four metrics that utilized third-party models for evaluation.

- 14 • Average Keypoint Distance (AKD [6]). This metric computes the average keypoint distance  
15 between generated and ground-truth images. It is designed to evaluate the pose quality of the  
16 generated images. We use existing detectors [2] to extract the facial landmarks.
- 17 • Average Euclidean Distance (AED [6]). This metric is designed to assess the identity quality of  
18 generated images based on specific feature representations, that extracted from a pre-trained facial  
19 identification network [1]. The average Euclidean distance between generated and ground-truth  
20 video frames is computed.
- 21 • Average Rotation Distance (ARD [3]). We use the toolbox py-feat [4] to extract the Euler angles of  
22 the head poses, and then compute the average Euler angles distance between the generated and  
23 driving images. This metric evaluates the head pose quality.
- 24 • Action Units Hamming distance (AUH [3]). This metric measure the quality of facial expression, it  
25 computes the average Hamming distance between action units of generated and driving images.  
26 We use the toolbox py-feat [4] to extract facial action units.

Table A1: Cross-identity evaluation on the Voxceleb1 dataset.

|     | FOMM  | MRAA  | LIA   | DAM   | DaGAN | TPSM  | FNeVR | Ours         |
|-----|-------|-------|-------|-------|-------|-------|-------|--------------|
| ARD | 3.122 | 2.678 | 3.883 | 2.669 | 3.090 | 2.724 | 2.755 | <b>2.399</b> |
| AUH | 0.850 | 0.729 | 0.772 | 0.717 | 0.751 | 0.668 | 0.751 | <b>0.625</b> |

27 **Cross-identity animation evaluation:** In the cross-identity scenario, we do not have ground-truth  
28 label videos, so we use the ARD and AUH metrics to evaluate the facial expression and head pose  
29 quality. Table A1 illustrates that our method surpasses others by a significant margin in both metrics,  
30 indicating its efficacy in capturing finer motions with good precision.

31 **Component ablations:** We conducted a thorough examination of the inputs and outputs of our  
32 non-prior based motion refinement module through detailed ablations. Specifically, we explored the  
33 impacts of the model variants of the source structure encoder without the input of a source image, the

Table A2: Component ablations of the inputs and outputs of the proposed non-prior based motion refinement module. We present results on the Voxceleb1 dataset.

|                                  | L1            | PSNR         | LPIPS        | AKD          | AED          |
|----------------------------------|---------------|--------------|--------------|--------------|--------------|
| <i>w/o</i> occlusion             | 0.0354        | <b>25.53</b> | <b>0.151</b> | 1.177        | 0.108        |
| <i>w/o</i> flow                  | 0.0361        | 25.40        | 0.155        | 1.190        | 0.117        |
| <i>w/o</i> warped source feature | 0.0355        | 25.48        | 0.153        | 0.183        | 0.113        |
| <i>w/o</i> source image          | 0.0355        | 25.51        | <b>0.151</b> | 1.180        | 0.109        |
| Ours full                        | <b>0.0353</b> | 25.51        | 0.152        | <b>1.176</b> | <b>0.107</b> |

Table A3: Analysis on the different setting of  $r$ . We present results on the Voxceleb1 dataset. Our method is generally robust to the pyramid levels and the patch radius.

|                | L1            | PSNR         | LPIPS        | AKD          | AED          |
|----------------|---------------|--------------|--------------|--------------|--------------|
| $P = 0, r = 2$ | 0.0355        | 25.48        | <b>0.151</b> | 1.185        | 0.109        |
| $P = 0, r = 3$ | 0.0354        | 25.52        | <b>0.151</b> | 1.174        | 0.107        |
| $P = 0, r = 4$ | <b>0.0351</b> | <b>25.54</b> | <b>0.151</b> | 1.185        | 0.111        |
| $P = 1, r = 2$ | 0.0354        | 25.51        | <b>0.151</b> | 1.186        | 0.110        |
| $P = 1, r = 3$ | 0.0353        | 25.51        | <b>0.151</b> | 1.176        | 0.107        |
| $P = 1, r = 4$ | 0.0353        | 25.51        | <b>0.151</b> | 1.183        | 0.109        |
| $P = 2, r = 2$ | 0.0355        | 25.52        | <b>0.151</b> | <b>1.173</b> | <b>0.106</b> |
| $P = 2, r = 3$ | 0.0355        | 25.49        | 0.152        | 1.184        | 0.109        |
| $P = 2, r = 4$ | 0.0355        | 25.43        | 0.152        | 1.192        | 0.112        |

flow updater without the input of warped source features, and the flow updater without the output of occlusion or flow (i.e. only updating either occlusion or flow and keeping the other the same as in the initialization process). The results are presented in Table A2. It is noteworthy that both the warped source feature and the source image play an important role in the motion refinement process as demonstrated by the decreased AKD and AED metric values on the *w/o* warped source feature and *w/o* source image variants. Importantly, if we solely update the occlusion map without updating the motion flow, a significant decrease in AKD and AED metrics occurs, validating the significance of our motivation to refine the coarse motion flow estimated by prior-based motion models. We do observe a slight performance decrease when not updating the occlusion map, further demonstrating the importance of refining motion flow.

**Parameter analysis:** In the main paper, we examined the sampled patch radius  $r$  in the structure correlation volume. Here we continue to explore this parameter along with the pyramid levels we utilized for the correlation volume, as both of these parameters can expand the the search space of the structure correlation volume, resulting in the expanded correlation feature dimensions. Specifically, we pool the structure correlation volume  $C \in \mathcal{R}^{h \times w \times h \times w}$  in the last two dimensions to obtain the pyramidal structure correlation volume  $\{C^i \in \mathcal{R}^{h \times w \times h/2^i \times w/2^i}\}_{i=0}^P$ . In the main paper’s experiments, we set  $P$  to 1. Note that in each iteration, we sample patch correlation features on all  $C^i$ ’s in the pyramid, as the pyramid design aims to capture more rich motion features of different scales, which is inspired by the optical flow method RAFT [7]. As presented in Table A3, when we increased the pyramid levels, we observed no significant performance improvements. This indicates that the single level pyramid provided sufficient motion information for our motion flow refinement. In summary, we empirically set  $P = 1, r = 3$  in our primary experiments to demonstrate our approach’s generality, even though we could potentially achieve even better performance with other parameter choices.

## References

- [1] Brandon Amos, Bartosz Ludwiczuk, Mahadev Satyanarayanan, et al. Openface: A general-purpose face recognition library with mobile applications. *CMU School of Computer Science*, 6(2), 2016. 1
- [2] Adrian Bulat and Georgios Tzimiropoulos. How far are we from solving the 2d & 3d face alignment problem?(and a dataset of 230,000 3d facial landmarks). In *Proceedings of the IEEE International Conference on Computer Vision*, pages 1021–1030, 2017. 1
- [3] Michail Christos Doukas, Stefanos Zafeiriou, and Viktoriia Sharmanska. Headgan: One-shot neural head synthesis and editing. In *Proceedings of the IEEE/CVF International Conference on Computer Vision*, pages 14398–14407, 2021. 1

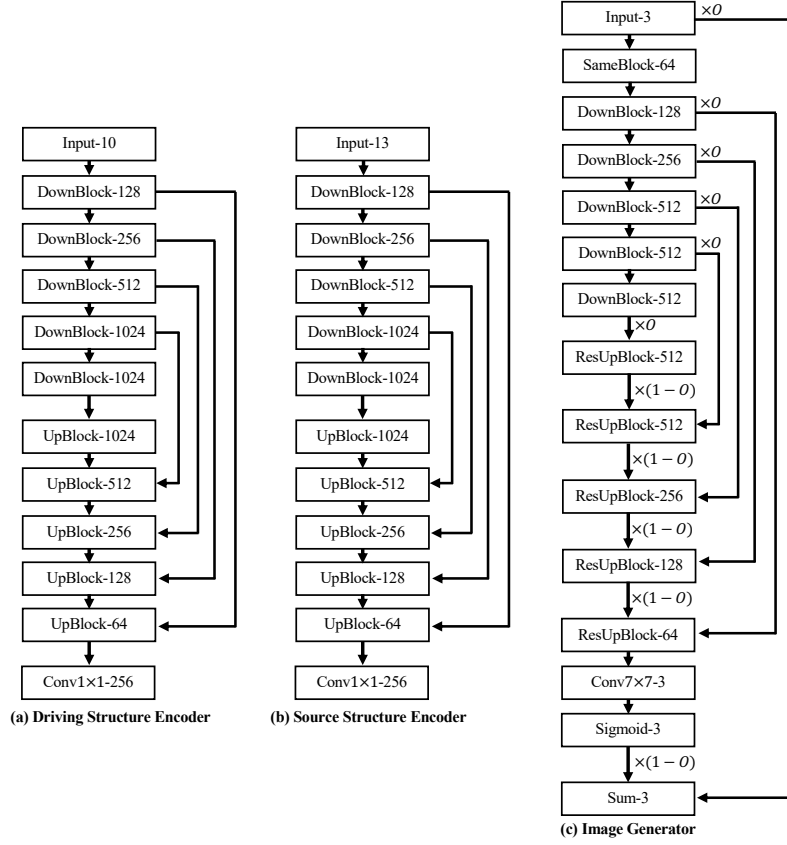

Figure A1: Detailed architectures of the driving structure encoder, the source structure encoder, and the image generator.

- [4] Eshin Jolly, Jin Hyun Cheong, Tiankang Xie, Sophie Byrne, Matthew Kenny, and Luke J Chang. Py-feat: Python facial expression analysis toolbox. *arXiv preprint arXiv:2104.03509*, 2021. 1
- [5] Aliaksandr Siarohin, Stéphane Lathuilière, Sergey Tulyakov, Elisa Ricci, and Nicu Sebe. Animating arbitrary objects via deep motion transfer. In *Proceedings of the IEEE/CVF Conference on Computer Vision and Pattern Recognition*, pages 2377–2386, 2019. 1
- [6] Aliaksandr Siarohin, Stéphane Lathuilière, Sergey Tulyakov, Elisa Ricci, and Nicu Sebe. First order motion model for image animation. In *Advances in Neural Information Processing Systems*, 2019. 1
- [7] Zachary Teed and Jia Deng. Raft: Recurrent all-pairs field transforms for optical flow. In *Computer Vision—ECCV 2020: 16th European Conference, Glasgow, UK, August 23–28, 2020, Proceedings, Part II 16*, pages 402–419. Springer, 2020. 2
- [8] Jian Zhao and Hui Zhang. Thin-plate spline motion model for image animation. In *Proceedings of the IEEE/CVF Conference on Computer Vision and Pattern Recognition*, pages 3657–3666, 2022. 1
